1  
2 **Deficiency in the cell-adhesion molecule *dscaml1* impairs hypothalamic CRH**  
3 **neuron development and perturbs normal neuroendocrine stress axis function**

4  
5 Manxiu Ma<sup>1</sup>, Alyssa A. Brunal<sup>1,2</sup>, Kareem C. Clark<sup>1</sup>, Carleigh Studtmann<sup>1,2</sup>, Katelyn  
6 Stebbins<sup>1,2,3</sup>, Shin-ichi Higashijima<sup>4</sup>, Y. Albert Pan<sup>1,5,6\*</sup>

7  
8 1. Fralin Biomedical Research Institute at Virginia Tech Carilion, Virginia Tech, Roanoke, VA  
9 24016, USA

10 2. Translational Biology Medicine and Health Graduate Program, Virginia Tech, Blacksburg,  
11 VA 24061, USA

12 3. Virginia Tech Carilion School of Medicine, Roanoke, VA 24016, USA

13 4. National Institutes of Natural Sciences, Exploratory Research Center on Life and Living  
14 Systems, National Institute for Basic Biology, Okazaki, Aichi 444-8787, Japan

15 5. Department of Biomedical Sciences and Pathobiology, Virginia-Maryland College of  
16 Veterinary Medicine, Virginia Tech, Blacksburg, VA 24060, USA

17 6. Department of Psychiatry and Behavioral Medicine, Virginia Tech Carilion School of  
18 Medicine, Roanoke, VA 24016, USA

19  
20 \*Correspondence should be addressed to Y. Albert Pan, email: [yapan@vtc.vt.edu](mailto:yapan@vtc.vt.edu)

21

## 22 **ABSTRACT**

23       The corticotropin-releasing hormone (CRH)-expressing neurons in the hypothalamus  
24 are critical regulators of the neuroendocrine stress response pathway, known as the  
25 hypothalamic-pituitary-adrenal (HPA) axis. As developmental vulnerabilities of CRH  
26 neurons contribute to stress-associated neurological and behavioral dysfunctions, it is  
27 critical to identify the mechanisms underlying normal and abnormal CRH neuron  
28 development. Using zebrafish, we identified *Down syndrome cell adhesion molecule like-1*  
29 (*dscaml1*) as an integral mediator of CRH neuron development and necessary for  
30 establishing normal stress axis function. In *dscaml1* mutant animals, hypothalamic CRH  
31 neurons had higher *crhb* (the CRH homolog in fish) expression, increased cell number, and  
32 reduced cell death compared to wild-type controls. Physiologically, *dscaml1* mutant animals  
33 had higher baseline stress hormone (cortisol) levels and attenuated responses to acute  
34 stressors. Together, these findings identify *dscaml1* as an essential factor for stress axis  
35 development and suggest that HPA axis dysregulation may contribute to the etiology of  
36 human *DSCAML1*-linked neuropsychiatric disorders.

## 37 **INTRODUCTION**

38       The hypothalamic corticotropin-releasing hormone (CRH)-expressing neurons are the  
39 central regulators of the neuroendocrine stress response pathway, known as the  
40 hypothalamic-pituitary-adrenal (HPA) axis in mammals or the hypothalamic-pituitary-  
41 interrenal (HPI) axis in fish (Denver, 2009). Upon exposure to environmental disturbances  
42 (i.e., stressors), stress-related neural inputs converge on hypothalamic CRH neurons to  
43 activate a hormonal cascade that ultimately leads to the release of glucocorticoids, which

44 broadly affects cognitive, affective, metabolic, and immune functions (Spencer and Deak,  
45 2017; McEwen and Akil, 2020).

46 The development of CRH neurons has profound effects on the function of the HPA and  
47 HPI axis (collectively referred to as the stress axis). Developmental perturbations of CRH  
48 neurons, particularly in early-life periods, lead to long-term changes in CRH neuron function  
49 (Regev and Baram, 2014). Additionally, rodent models demonstrate that dysregulation of  
50 CRH neurons increases anxiety- and depressive-like phenotypes (Keen-Rhinehart et al.,  
51 2009; Kolber et al., 2010). These studies underscore the need to identify the genes and  
52 molecules mediating CRH-neuron development and determine how developmental  
53 perturbations affect stress axis function.

54 During early development, hypothalamic CRH neurons are generated from progenitors  
55 in the ventral diencephalon (Alvarez-Bolado, 2019; Nagpal et al., 2019; Placzek et al., 2020).  
56 Secreted factors including FGF10, SHH, BMPs, and Nodal first define the anterior-dorsal  
57 hypothalamic domain; within this domain, CRH neurons are progressively specified by a  
58 combination of key transcription factors, including *Fezf2*, *Otp*, *Sim1*, *Arnt2*, and *Brn2*. Once  
59 specified, CRH neurons require further differentiation, such as neuronal morphogenesis,  
60 synaptogenesis, epigenetic programming, and cell death, to establish a functional stress-  
61 responsive neural circuit. These later stages of neuronal differentiation are shaped by  
62 intercellular interactions mediated by membrane-localized cell-adhesion molecules  
63 (Moreland and Poulain, 2022). The specific cell-adhesion molecules that mediate  
64 developmental signaling in CRH neurons are still unknown.

65 To address this knowledge gap, we utilized zebrafish (*Danio rerio*) as the model. The  
66 structure and function of the mammalian HPA axis and the teleostean HPI axis are highly

67 conserved (Wendelaar Bonga, 1997; Lohr and Hammerschmidt, 2011). In mammals, the CRH  
68 neurons that are involved in HPA-axis activation are in the hypothalamic paraventricular  
69 nucleus (PVN). In teleosts (ray-finned fish), the neuroendocrine preoptic area (NPO) is  
70 ontogenically equivalent to the PVN, and CRH neurons within the NPO perform similar roles  
71 as their mammalian counterparts (Herget and Ryu, 2015). A unique advantage of the  
72 zebrafish system is its rapid and external development. The development of the HPI axis  
73 begins between 1-2 days post fertilization (dpf), and stress-induced cortisol signaling and  
74 behaviors can be observed at 4-5 dpf (Alsop and Vijayan, 2008; Alderman and Bernier, 2009;  
75 Bai et al., 2016). The rapid development and translucency of zebrafish allow direct  
76 microscopic observation of CRH neuron development in intact, developing animals.

77 In this study, we investigated the roles of a conserved neuronal signaling molecule—  
78 *Down syndrome cell adhesion molecule-like 1* (zebrafish gene: *dscaml1*; mouse gene: *Dscaml1*;  
79 Human gene: *DSCAML1*; Protein: DSCAML1). DSCAML1 is one of two DSCAM family members  
80 in vertebrates, the other being DSCAM (Garrett et al., 2012). Unlike invertebrate DSCAMs,  
81 vertebrate DSCAMs are not significantly alternatively spliced (Sanes and Zipursky, 2020). In  
82 the mammalian retina, DSCAML1 prevents excessive aggregation between cells and  
83 promotes developmental cell death (Fuerst et al., 2009; Garrett et al., 2016). DSCAML1 also  
84 acts to refine synaptic specificity and synapse number (Yamagata and Sanes, 2008; Sachse et  
85 al., 2019). In humans, rare variants in *DSCAML1* are associated with several  
86 neurodevelopmental disorders, including autism spectrum disorder, cortical abnormality,  
87 and epilepsy (Iossifov et al., 2014; Karaca et al., 2015; Hayase et al., 2020; Ogata et al., 2021).  
88 Genetic and epigenetic studies also implicate *DSCAML1* in the stress response to violent

89 experiences (Caramillo et al., 2015; Saadatmand et al., 2021). However, the relationship  
90 between *DSCAML1* and the stress axis remains unknown.

91 Using zebrafish, we previously explored how *DSCAML1* affects neural pathways and  
92 systemic functions (Ma et al., 2020a; Ma et al., 2020b). We found that *dscaml1* deficiency  
93 resulted in various physiological and behavioral deficits, including darker pigmentation,  
94 slower light adaptation, and slower eye movements (saccades) (Ma et al., 2020b).  
95 Interestingly, darker pigmentation and slower light adaptation can also be caused by  
96 abnormal glucocorticoid receptor signaling, as seen in the zebrafish *glucocorticoid receptor*  
97 (*gr*) mutants, suggesting that the stress axis may be dysfunctional in *dscaml1* mutants  
98 (Griffiths et al., 2012; Muto et al., 2013).

99 Here, we report that *dscaml1* deficiency in zebrafish perturbs CRH neuron development  
100 and impairs the normal function of the HPI axis. These findings show that *DSCAML1* is  
101 necessary for stress axis development and raise the possibility that stress dysfunction  
102 contributes to human *DSCAML1*-linked disorders.

## 103 **RESULTS**

### 104 ***dscaml1* deficiency results in overexpression of neuroendocrine factors**

105 To gain an unbiased view of the molecular changes resulting from *dscaml1* deficiency, we  
106 compared the transcriptomic profiles between *dscaml1* homozygous mutant (*dscaml1*<sup>-/-</sup>)  
107 and control (wild type) animals using RNA sequencing (RNA-seq). cDNA from whole 3.5-4  
108 days post-fertilization (dpf) *dscaml1*<sup>-/-</sup> and control larvae were sequenced using an Illumina  
109 next-generation sequencer. Using a threshold of at least two-fold change and an adjusted *p*-

110 value of less than 0.01, we identified 25 upregulated and 79 downregulated genes (Fig. 1A,  
111 Supplementary file 1).

112 Among the 25 upregulated genes in the *dscaml1*<sup>-/-</sup> animals, 7 were secreted  
113 neuropeptides/hormones expressed in the hypothalamus or pituitary: *corticotropin-*  
114 *releasing hormone b (crhb)*, *parathyroid hormone 2 (pth2)*, *somatolactin beta (smtlb)*, *cocaine-*  
115 *and amphetamine-regulated transcript 3 (cart3)*, *proopiomelanocortin a (pomca)*, *arginine*  
116 *vasopressin (avp)*, and *spexin hormone (spx)*. Among them, three (*crhb*, *avp*, *pomca*) are core  
117 regulators of the HPI axis (Alsop and Vijayan, 2009; Lohr and Hammerschmidt, 2011). *crhb*  
118 encodes the zebrafish CRH; *avp* encodes the neuropeptide AVP that controls osmolarity,  
119 blood pressure, and synergizes with CRH to promote cortisol release; *pomca* encodes the  
120 adrenocorticotrophic hormone (ACTH), the primary pituitary hormone that triggers  
121 glucocorticoid release. Additionally, two genes involved in apoptosis are upregulated: *BCL2*  
122 *apoptosis regulator b (bcl2b)* and *phorbol-12-myristate-13-acetate-induced protein 1*  
123 *(pmaip1/noxa)*. Protein class categorization analysis with PANTHER revealed “intercellular  
124 signal molecule” as the largest class (4 genes, 16%) (Fig. 1B) (Mi et al., 2021).

125 The 79 genes downregulated in the *dscaml1*<sup>-/-</sup> animals are more diverse in function  
126 compared to the upregulated genes. Protein class categorization analysis with PANTHER  
127 identified the largest protein classes as metabolite interconversion enzymes (12 genes,  
128 15.19%), protein-binding activity modulators (9 genes, 11.39%), transporters (8 genes,  
129 10.13%), and defense/immunity protein (6 genes, 7.59%) (Fig. 1C). We noted that 30 of the  
130 79 (38%) downregulated genes are highly expressed in the liver, and 10 of these genes are  
131 involved in innate immunity and the complement cascade (Fig. 1A, Supplementary file 2).

132 These results suggest that liver function and innate immunity may be suppressed in the  
133 *dscaml1* mutants.

134 To identify the signaling pathways affected by *dscaml1* deficiency, we analyzed all  
135 differentially expressed genes ( $p < 0.01$ , 210 mapped genes) using the statistical enrichment  
136 test (PANTHER Classification System, version 17.0) (Mi et al., 2021). All significantly  
137 enriched (FDR  $< 0.05$ ) Gene Ontology (GO) terms for molecular function relate to the parent  
138 GO term *hormone activity* (Fig. 1D). The PANTHER pathway analysis also identified another  
139 significant stress-modulating neuropeptide, *adenylate cyclase activating polypeptide 1b*  
140 (*adcyap1b*, also known as *PACAP*) that is significantly upregulated (0.66 fold change,  
141 adjusted  $p < 0.0001$ ) (Stroth et al., 2011).

142 Together, our transcriptomic analyses indicate that *dscaml1* deficiency results in the  
143 upregulation of neuropeptide/hormonal signaling and the downregulation of liver and  
144 innate immune function. Suppression of liver and immune function is a hallmark of stress  
145 axis activation, which is consistent with the overexpression of the principal neuropeptides  
146 involved in the stress axis (*crhb*, *avp*, *pomca*, and *adcyap1b*).

#### 147 ***dscaml1* deficiency alters the development of CRH neurons in the NPO**

148 To further investigate whether the stress axis is perturbed in *dscaml1* mutants, we  
149 examined the development of CRH neurons in the NPO (CRH<sup>NPO</sup> neurons), which are  
150 characterized by their expression of *crhb* (Fig. 2A) (Herget et al., 2014; Vom Berg-Maurer et  
151 al., 2016). We focused on three developmental stages (2, 3, and 5 dpf) that span the period  
152 between the first appearance of *crhb*<sup>+</sup> neurons in the NPO (2 dpf) and the onset of stress axis  
153 responsivity (4-5 dpf) (Chandrasekar et al., 2007; Alderman and Bernier, 2009; Clark et al.,  
154 2011).

155 Using fluorescent *in situ* hybridization (FISH), we found that *crhb* expression pattern was  
156 initially similar between *dscaml1*<sup>-/-</sup> and wild-type (WT) at 2 dpf (Fig. 2B-B'). At 3 dpf, we  
157 began to see higher *crhb* expression in the NPO of *dscaml1*<sup>-/-</sup> animals (Fig. 2C-C'). At 5 dpf,  
158 there is widespread overexpression of *crhb* in *dscaml1*<sup>-/-</sup> animals, with *crhb* FISH intensity  
159 most notably elevated in the NPO (Fig. 2D-D'). Quantification of *crhb* FISH signal intensity  
160 among CRH<sup>NPO</sup> neurons showed that *crhb* expression is higher in *dscaml1*<sup>-/-</sup> animals,  
161 compared to wild-type animals (WT) (Fig. 2E). There was a significant difference in signal  
162 intensity per cell by developmental stage and genotype, and a significant interaction  
163 between stage and genotype (two-way ANOVA, Supplementary Table I). Pair-wise  
164 comparisons with Holm-Sidak correction found a significant increase at 3 and 5 dpf but not  
165 at 2 dpf (Fig 2E).

166 In addition to changes in *crhb* expression levels, *dscaml1* deficiency also increased the  
167 number of *crhb*-expressing CRH<sup>NPO</sup> neurons. In WT animals, the number of CRH<sup>NPO</sup> neurons  
168 increased over time, from 14.78 cells (2 dpf) to 18.85 cells (3 dpf) to 26.60 cells (5 dpf) per  
169 animal (Fig 2B, C, D, F). In *dscaml1*<sup>-/-</sup> animals, the number of CRH<sup>NPO</sup> neurons increased at a  
170 higher rate, from 12.67 cells (2 dpf) to 19.46 cells (3 dpf) to 36.39 cells (5 dpf) per animal  
171 (Fig. 2B', C', D', F). There was a significant difference in cell number by developmental stage  
172 and genotype, and there was a significant interaction between stage and genotype (Two-way  
173 ANOVA, Supplementary Table I). Pair-wise comparisons with Holm-Sidak correction found  
174 a significant increase in cell number between *dscaml1*<sup>-/-</sup> and WT animals at 5 dpf but not at  
175 2 and 3 dpf (Fig 2F, adjusted *p* values as shown).

176 Overall, we found significant increases in *crhb* expression and cell number in CRH<sup>NPO</sup>  
177 neurons in *dscaml1*<sup>-/-</sup> mutants as compared to WT. These phenotypes were not due to the



178 visual deficits in *dscaml1*<sup>-/-</sup> animals (Ma et al., 2020b), as similar phenotypes were observed  
179 in animals raised in the dark (Supplementary Fig. 1). Together, these findings show that  
180 *dscaml1* is essential for the normal developmental trajectory of CRH<sup>NPO</sup> neurons.

### 181 ***dscaml1* is essential for normal CRH<sup>NPO</sup> neuron cell death**

182 Based on the finding that mouse DSCAML1 promotes programmed cell death (PCD) in  
183 the retina (Garrett et al., 2016) and our transcriptomic analysis that showed *dscaml1*  
184 mutants expressing higher levels of genes involved in regulating apoptosis (Fig. 1A), we  
185 hypothesized that *dscaml1* deficiency might impair normal CRH<sup>NPO</sup> neuron cell death. To test  
186 this hypothesis, we tracked the fate of individual CRH<sup>NPO</sup> neurons using *in vivo* time-lapse  
187 imaging at 3-5 dpf, when cell number begins to diverge between *dscaml1*<sup>-/-</sup> and WT animals.

188 To visualize CRH<sup>NPO</sup> neurons in live zebrafish, we generated a *crhb* knock-in fluorescent  
189 reporter line using CRISPR-mediated genomic insertion (Fig. 3A) (Kimura et al., 2014). A Cre-  
190 switchable *hsp-LoxP-RFP-LoxP-GFP* cassette was inserted 35 base pairs upstream of the first  
191 exon of *crhb* so that the expression of RFP (default) or GFP (with Cre-mediate recombination)  
192 would mark the endogenous *crhb*-expressing cells (Fig. 3B). The resulting transgenic line,  
193 *crhb:LoxP-RFP-LoxP-GFP* (*crhb:LRLG*), has RFP and GFP expression pattern that matches the  
194 endogenous *crhb* transcript expression patterns (Fig. 3C-D, compare to Fig. 2D). To validate  
195 the fidelity of fluorescent reporter expression, we examined whether *crhb:LRLG*-labeled cells  
196 in the NPO express CRH protein. In animals not exposed to Cre (default RFP expression), we  
197 found that most RFP<sup>+</sup> neurons are CRH immunopositive (84.71±2.19%, Supplementary Fig.  
198 2A-B). Together, these results indicate that the *crhb:LRLG* line reliably labels CRH<sup>NPO</sup> neurons.

199 In *crhb:LRLG* animals, *dscaml1* deficiency increased the number of RFP-labeled CRH<sup>NPO</sup>  
200 neurons (Fig. 3E-F'). There were significant differences by age and genotype, with no

201 significant interaction (two-way ANOVA, Supplementary Table I). There was a significantly  
202 higher number of RFP-positive neurons in the *dscaml1* mutants at 5 dpf but not 3 dpf (Fig.  
203 3G, multiple comparison test with Holm-Sidak correction). This result corroborates our *crhb*  
204 FISH results that show increased CRH<sup>NPO</sup> neuron number in *dscaml1* mutants (Fig. 2F).

205 Using the *crhb:LRLG* line, we first performed time-lapse imaging in anesthetized animals.  
206 We induced partial Cre-mediated recombination by injecting *CreER* mRNA into *crhb:LRLG*  
207 animals at the 1-cell stage and adding 4-hydroxytamoxifen (4-OHT) to activate CreER at 6-  
208 24 hpf (Fig. 3B). At 3-4 dpf, intermingled GFP+ and RFP+ cells can be seen in the NPO by  
209 confocal imaging (Fig. 3H-H'' and Supplementary video 1). Over time, some labeled cells  
210 moved away from the CRH<sup>NPO</sup> neuron cluster. These cells were likely dying cells being carried  
211 away by microglia, as seen in previous zebrafish studies (Mazaheri et al., 2014). To confirm  
212 this, we induced GFP expression (by injecting codon-optimized *Cre* mRNA)(Horstick et al.,  
213 2015) in all *crhb:LRLG*-labeled cells and labeled microglia with the *mpeg1:mCherry* transgene  
214 (Fig. 3I-I'' and Supplementary video 2) (Espenschied et al., 2019). Indeed, mCherry+  
215 microglia migrated toward the GFP+ cell cluster, engulfed GFP-positive CRH<sup>NPO</sup> neurons, and  
216 carried the engulfed cells away. The remnant of the engulfed cell can be seen inside a large  
217 vacuole within the microglia (Fig. 3J-J'). These results suggest that CRH<sup>NPO</sup> neurons undergo  
218 PCD and that dying cells are rapidly removed by microglia.

219 Next, to track the fate of individual CRH<sup>NPO</sup> neurons, we performed two-photon imaging  
220 from 3 to 5 dpf on *crhb:LRLG* animals with partial Cre-mediated recombination (Fig. 4A). To  
221 minimize the potential effects of stress on PCD (Irles et al., 2014), we anesthetized and  
222 immobilized the animals during imaging. In between imaging sessions, each animal is  
223 allowed to recover in individual wells of 12-well plates, under normal light-dark cycles. Cells

224 that are present at the first time point (78 hpf) were tracked at four subsequent time points  
225 (84, 96, 108, and 120 hpf) and categorized as either persisting (present at the last time point)  
226 or lost (lost at any of the following time points) (Fig. 4B-B"). Overall, we observe a trend of  
227 reduced cell loss in the *dscaml1*<sup>+/-</sup> and *dscaml1*<sup>-/-</sup> animals (Chi-square test for trend,  
228  $p=0.0398$ ) (Fig. 4C, total number of tracked cells as indicated). In WT animals, 16.41% of  
229 cells are lost, versus 10.91% and 7.53% for *dscaml1*<sup>+/-</sup> and *dscaml1*<sup>-/-</sup>, respectively.

230 Finally, considering the timing of cell loss, we plotted the survival curve of CRH<sup>NPO</sup>  
231 neurons for each genotype. Again, there was a significant difference in the trends of cell loss  
232 (Logrank test for trend,  $p=0.0098$ ), with the *dscaml1*<sup>-/-</sup> animals consistently showing a  
233 higher survival rate (Fig. 4D). Together, these results show that *dscaml1* deficiency reduces  
234 PCD of CRH<sup>NPO</sup> neurons.

### 235 **Stress axis function is perturbed in *dscaml1* mutant animals**

236 Given the developmental perturbation of CRH<sup>NPO</sup> neurons as well as the global changes  
237 in gene expression related to stress axis activation, we next determined whether the  
238 hormonal output of the stress axis—cortisol—is altered. Cortisol levels were measured using  
239 an enzyme-linked immunosorbent assay (ELISA) on homogenates made from pools of 5 dpf  
240 animals (30 animals per sample, 6 samples per condition). All animals were raised under  
241 standardized conditions, at the same density, and with a normal circadian cycle (14 h day/10  
242 h night) (Yeh et al., 2013). Under this circadian cycle, *dscaml1* mutant animals exhibit similar  
243 diurnal locomotor rhythms as wild-type animals (Ma et al., 2020b).

244 Baseline and stressed conditions were tested to evaluate potential alterations of cortisol  
245 in control (WT and *dscaml1*<sup>+/-</sup>) and *dscaml1*<sup>-/-</sup> animals at 5 dpf. To measure baseline cortisol,  
246 we collected unperturbed animals within 30 min after light onset (zeitgeber time 0, ZT0) and

247 in the afternoon (ZT6-8). To measure stress-induced cortisol, animals were exposed to either  
248 stirring stress (swirling water, 5 minutes)(Castillo-Ramirez et al., 2019) or hyperosmotic  
249 stress (250 mM NaCl, 20 minutes) at ZT6-8 (Yeh et al., 2013). These acute stressors are well-  
250 characterized and are comparable to the water current and salinity changes experienced by  
251 zebrafish larvae in their natural habitat (Clark et al., 2011).

252 At baseline, *dscaml1*<sup>-/-</sup> animals had significantly higher cortisol levels than control  
253 animals (Multiple Mann-Whitney test with Holm-Sidak correction. Adjusted *p* values shown  
254 in Fig. 5A). At ZT0, the *dscaml1* mutant baseline cortisol levels were 2.7-fold higher than that  
255 of controls (median 350.06 pg/ml versus 129.80 pg/ml). The difference in cortisol was less  
256 pronounced at ZT6-8, but *dscaml1* mutants still had 2-fold higher cortisol levels than  
257 controls at baseline (median 238.508 pg/ml versus 118.516 pg/ml).

258 After acute exposure to stressors, we found that *dscaml1* mutant animals exhibited  
259 attenuated cortisol induction. We assessed the extent of stress-induced cortisol production  
260 by normalizing cortisol levels to the baseline cortisol of the same genotype at the same  
261 circadian time (ZT6-8). In the control group, stirring stress and hyperosmotic stress  
262 produced 1.88 and 1.95-fold increases in cortisol over the control baseline, respectively  
263 (grey bars, Fig. 5B). The response to hyperosmotic stress was more robust ( $p=0.0113$ ,  
264 Multiple Mann-Whitney tests with Holm-Sidak correction) than that generated by stirring  
265 stress ( $p=0.0546$ ). In the *dscaml1*<sup>-/-</sup> group, stirring stress and hyperosmotic stress only  
266 produced 1.29 and 1.4-fold increases in cortisol over the *dscaml1*<sup>-/-</sup> baseline, respectively  
267 (red bars, Fig. 5B). These increases were not statistically significant ( $p>0.9999$  for stirring  
268 stress,  $p=0.9768$  for hyperosmotic stress).

269 Together, these results show that *dscaml1* deficiency elevates baseline cortisol levels and  
270 impairing responses to acute stressors. These findings indicate that *dscaml1* is critical for  
271 establishing the normal function of the stress axis.

## 272 ***dscaml1* mutants are responsive to glucocorticoids**

273 Some aspects of the stress axis-related phenotypes in *dscaml1* mutants resemble the  
274 zebrafish *glucocorticoid receptor (gr)* mutants. In particular, both *gr* and *dscaml1* mutants  
275 exhibit elevated baseline cortisol and *crhb* (Ziv et al., 2013). This resemblance raises the  
276 possibility that the *dscaml1* mutant phenotypes may result from insufficient glucocorticoid  
277 receptor-mediated signaling. To test this, we examined whether *dscaml1* mutants can  
278 respond transcriptionally to exogenously applied glucocorticoids. We examined the  
279 expression of *crhb* in the NPO, as it is under feedback control from glucocorticoid-  
280 glucocorticoid receptor signaling (Watts, 2005).

281 A synthetic glucocorticoid receptor agonist, dexamethasone (Dex), was added to the  
282 embryo media at a final concentration of 2  $\mu$ M from 4 to 5 dpf (24 hours). Vehicle (0.02%  
283 ethanol) treated siblings were used for comparison. For *crhb* transcript level in CRH<sup>NPO</sup>  
284 neurons, we found significant differences caused by Dex treatment and genotype, with  
285 significant interaction between the two (two-way ANOVA, Supplementary Table I). Multiple  
286 comparison tests found that Dex significantly reduced *crhb* transcript level in *dscaml1*<sup>-/-</sup>  
287 animals but not in wild-type animals (Holm-Sidak correction, Fig. 5C with *p* values as  
288 indicated). These results show that *dscaml1* deficiency does not result in a loss of  
289 glucocorticoid responsivity in CRH<sup>NPO</sup> neurons. Instead, *dscaml1* deficiency may render  
290 animals more sensitive to the inhibitory effects of glucocorticoids.

## 291 **DISCUSSION**

292 The present study provides evidence that *dscaml1* regulates the development of  
293 hypothalamic CRH neurons and is necessary for normal stress axis function. At the  
294 transcriptome level, *dscaml1* deficiency in zebrafish results in gene expression changes that  
295 suggest stress axis hyperactivation. At the cellular level, we find that *dscaml1*<sup>-/-</sup>  
296 hypothalamic CRH neurons (CRH<sup>NPO</sup> neurons) have increased stress axis-associated  
297 neuropeptide (*crhb*) expression, increased cell number, and reduced cell death.  
298 Physiologically, *dscaml1* deficiency impairs normal neuroendocrine stress axis function,  
299 which is potentially caused by developmental deficits in CRH<sup>NPO</sup> neurons as well as systemic  
300 changes in hormone/neuropeptide signaling (Fig. 6). Together, these findings link DSCAML1  
301 to the development of the stress axis and shed new light on the potential etiology of human  
302 *DSCAML1*-linked mental health conditions.

### 303 **DSCAML1 is a novel intercellular signaling molecule for CRH neuron development**

304 A major finding of this study is that DSCAML1 is necessary for the development of  
305 hypothalamic CRH neurons. To our knowledge, DSCAML1 is the first intercellular signaling  
306 molecule to be implicated in CRH neuron development. Our finding also provides the first  
307 link between DSCAML1 and hypothalamus development. We show that, similar to retinal  
308 neurons, the regulation of cell number by PCD is a DSCAML1-mediated process in CRH  
309 neurons (Garrett et al., 2016). Further investigations are required to determine whether  
310 other aspects of DSCAML1 function, such as the regulation of cellular spacing and  
311 synaptogenesis, are involved in CRH<sup>NPO</sup> neuron development (Fuerst et al., 2009; Yamagata  
312 and Sanes, 2010; Sachse et al., 2019). Additionally, given that *dscaml1* is expressed broadly  
313 in the nervous system (Ma et al., 2020b), including CRH neurons and non-CRH neurons

314 (Supplementary Figure 3), it will be important to address whether *DSCAML1* acts cell-  
315 autonomously in CRH<sup>NPO</sup> neurons.

### 316 **Regulation of CRH neuron cell death by DSCAML1**

317 During development, PCD is critical for eliminating transient cell types, matching input  
318 and output cell populations, and maintaining cellular spacing (Yamaguchi and Miura, 2015;  
319 Wong and Marin, 2019). It has been hypothesized that PCD in the hypothalamus may specify  
320 neural circuit assembly and shape output activity (Simerly, 2002; Forger, 2009). Congruent  
321 with this idea, reduced hypothalamic PCD caused by early-life stress is associated with  
322 increased sensitivity to acute stressors in adulthood (Zhang et al., 2012; Irles et al., 2014).

323 As an intercellular signaling molecule, DSCAML1 may act to transduce extracellular cell  
324 death cues. One potential cue is synaptic activity, which is critical for neuronal survival  
325 during development (Wong and Marin, 2019). In culture, DSCAML1 is localized to excitatory  
326 synapses (Yamagata and Sanes, 2010) and inhibits excitatory synaptogenesis when  
327 overexpressed (Sachse et al., 2019). It remains to be determined whether DSCAML1  
328 deficiency increases excitatory synaptic transmission and activates activity-dependent cell  
329 survival pathways in CRH neurons (Wong and Marin, 2019).

### 330 **Stress axis dysfunction in DSCAML1 deficient animals**

331 *dscaml1*<sup>-/-</sup> animals exhibit multiple signs of stress axis activation at baseline, including  
332 cortisol elevation and the suppression of immunity-associated genes. The elevated baseline  
333 cortisol levels likely resulted in attenuated responses to acute stressors, similar to animals  
334 under chronic cortisol administration (Barton et al., 1987; Johnson et al., 2006). A likely  
335 cause of these phenotypes is the overexpression of *crhb*. In mice, broad overexpression of

336 CRH leads to elevated corticosterone (the stress glucocorticoid in rodents) and produces  
337 phenotypes similar to Cushing's syndrome, a human disorder caused by the overproduction  
338 of cortisol (Stenzel-Poore et al., 1992; Arnett et al., 2016).

339 Beyond dysfunction of hypothalamic neurons and CRH signaling, a broader neurological  
340 imbalance can also activate the stress axis. For example, seizures have been shown to  
341 activate the HPA axis, which increases the likelihood of future seizures (O'Toole et al., 2014;  
342 Hooper et al., 2018). It has been reported that *Dscaml1* mutant rats and human patients with  
343 *DSCAML1* loss-of-function variants exhibit neuronal hyperactivation and seizures (Hayase et  
344 al., 2020). It is, therefore, possible that excitation-inhibition imbalance in extra-  
345 hypothalamic regions may result in increased CRH<sup>NPO</sup> neuron firing in zebrafish *dscaml1*  
346 mutants. Further studies on the cell-type-specific functions of *dscaml1* are needed to  
347 understand the precise cause of stress axis hyperactivation in *dscaml1*<sup>-/-</sup> animals.

#### 348 **The interplay between cortisol signaling and CRH neuron development**

349 Facilitation and feedback are signature features of the stress axis (Dallman et al., 1992;  
350 Spencer and Deak, 2017). While CRH neurons control cortisol levels, cortisol signaling also  
351 affects the development of CRH neurons. Zebrafish *gr* mutants have phenotypes similar to  
352 that of *dscaml1*<sup>-/-</sup> animals, including slow visual-background adaptation, sluggish light onset  
353 response, elevated cortisol, and increased expression of *crhb* and *pomca* (Griffiths et al., 2012;  
354 Muto et al., 2013; Ziv et al., 2013). Surprisingly, rather than decreased glucocorticoid  
355 receptor signaling (as in *gr* mutants), *dscaml1*<sup>-/-</sup> animals have intact glucocorticoid receptor  
356 signaling, with dexamethasone exerting strong suppression of *crhb* expression in the NPO.  
357 Thus, despite the superficial phenotypic similarity, the underlying signaling mechanisms are  
358 distinct between *dscaml1* and *gr* mutants. Nevertheless, further work is needed to



359 disambiguate the relationship between cortisol disturbances and developmental deficits. A  
360 possible approach would be to normalize cortisol levels by genetically ablating interrenal  
361 cells (i.e., genetic adrenalectomy) and supplementing with constant levels of exogenous  
362 cortisol (Gutierrez-Triana et al., 2015).

## 363 **Conclusions**

364 In conclusion, this work shows that *DSCAML1* is integral for developing the hypothalamic  
365 neurons that regulate the neuroendocrine stress axis. Using zebrafish as a vertebrate model  
366 for the ontogenesis of the stress axis, we found that *dscaml1* deficiency results in CRH neuron  
367 deficits and dysfunction of the stress axis. Genetic perturbations of *DSCAML1* are seen in  
368 patients suffering from a wide range of mental health disorders, including intellectual  
369 disability, autism spectrum disorder, schizophrenia, epilepsy, and stress disorder (Iossifov  
370 et al., 2014; Caramillo et al., 2015; Karaca et al., 2015; Hayase et al., 2020; Ogata et al., 2021;  
371 Saadatmand et al., 2021). Developmental deficits in the stress axis may contribute to the  
372 etiology of these disorders.

## 373 **MATERIALS AND METHODS**

### 374 **Zebrafish Husbandry**

375 Zebrafish (all ages) were raised under a 14/10 light/dark cycle at 28.5°C. Embryos and  
376 larvae were raised in E3 buffer (5 mM NaCl, 0.17 mM KCl, 0.33 mM CaCl<sub>2</sub>, 0.33 mM MgSO<sub>4</sub>)  
377 (Nüsslein-Volhard et al., 2002). All zebrafish used in this study were in a mixed background  
378 of AB and TL wild-type strains (Zebrafish International Resource Center). Sex was not a  
379 relevant variable for the stages used in this study (0-6 dpf), as laboratory zebrafish remain  
380 sexually undifferentiated until two weeks of age (Maack and Segner, 2003; Wilson et al.,

381 2014). All procedures were performed according to protocols approved by the Institutional  
382 Animal Care and Use Committee at Virginia Tech and the National Institute for Basic Biology.

### 383 **Transgenic and mutant zebrafish lines**

384 The *dscaml1<sup>vt1</sup>* loss-of-function allele contains a 7 base pair deletion that results in  
385 premature translational termination (Ma et al., 2020b). Animals used for live imaging were  
386 in homozygous *nacre* (*mitfa*) mutant background to prevent pigment formation (Lister et al.,  
387 1999). The microglia RFP line [*Tg(mpeg1:Gal4;UAS:NTR-mCherry)*] was obtained from Dr.  
388 John Rawls at Duke University (Espenschied et al., 2019). The *crhb:LoxP-RFP-LoxP-GFP* line  
389 was generated using CRISPR-mediated knock-in, as described by Kimura et al. (Kimura et al.,  
390 2014). The sgRNA sequence for the *crhb* knock-in locus is AGCTCGCGTCTGCGCAGAG.

### 391 **RNA-seq and differential gene expression analysis**

392 Progenies from heterozygous *dscaml1* mutant parents were anesthetized and harvested  
393 at 3.5-4 dpf. The anterior half of the animal was used for RNA preparation using the RNA  
394 Miniprep Kit (Zymo). The posterior half was used for genotyping. Three biological replicates  
395 for each group were analyzed, each containing RNA from 6-11 animals. All samples had RIN  
396  $\geq 8.0$  and were converted into a strand-specific library using Illumina's TruSeq Stranded  
397 mRNA HT Sample Prep Kit (RS-122-2103; Illumina) for subsequent cluster generation and  
398 sequencing on Illumina's NextSeq 75 sequencer. Sequence data processing, alignment, read  
399 count, mapping, and quality control were performed as previously described (Ates et al.,  
400 2020). Differential expression was tested for significance using the false discovery rate (FDR)  
401 (Benjamini-Hochberg) corrected Likelihood Ratio Test (LRT) in the R-package DESeq2 (Love  
402 et al., 2014). 238 and 116 genes showed a significant difference in read counts at FDR<0.01

403 and 0.001, respectively. Original sequence data have been deposited in NCBI's Gene  
404 Expression Omnibus (Edgar et al., 2002) and will be accessible through GEO Series accession  
405 number GSE213858.

#### 406 **Fluorescent *in situ* hybridization and immunohistochemistry**

407 Single and double whole-mount fluorescent *in situ* hybridization (FISH) was performed  
408 using protocols described previously (Pan et al., 2012). Probes were synthesized by *in vitro*  
409 transcription using the DIG and Fluorescein RNA Labeling Mix (Roche). DIG and fluorescein-  
410 labeled probes were detected with anti-DIG or anti-Fluorescein POD-conjugated Fab  
411 fragments (Roche) and Cy3 or Fluorescein TSA-plus Reagent (Akoya Biosciences). Plasmid  
412 template for *crhb* (Lohr et al., 2009) was provided by Dr. David Prober at Caltech. The  
413 *dscaml1* probe was generated as described previously (Ma et al., 2020b).

414 Immunohistochemistry was performed as described previously (Ma et al., 2020a). Nuclei  
415 were stained with TOTO-3 Iodide (ThermoFisher). RFP was stained with chicken anti-RFP  
416 (600-901-379S, Rockland) or rabbit anti-RFP (PM005, MBL Life Science). GFP was stained  
417 with rabbit anti-GFP (598, MBL Life Science). CRH was stained with rabbit anti-CRH (PBL  
418 rC68) provided by P. Sawchenko and J. Vaughan from the Salk Institute. All FISH and  
419 immunohistochemistry samples were mounted in 1.5% low-melt agarose in glass-bottomed  
420 Petri dishes (P50G-1.5-14-F; MatTek) and imaged using a Nikon A1 upright confocal  
421 microscope.

#### 422 **Cortisol extraction and ELISA**

423 A detailed protocol for cortisol extraction and ELISA is provided in the online  
424 supplementary method. At 4.5 dpf, *dscaml1*<sup>-/-</sup> and control animals were separated based on

425 the darker pigmentation of the *dscaml1*<sup>-/-</sup> animal (Ma et al., 2020b). 30-35 animals were  
426 placed in each petri dish for cortisol extraction. The morning baseline (unstressed) sample  
427 collections were done at 15-30 minutes after light onset (08:15-08:45), and the afternoon  
428 sample collections were done between 14:30-16:00. Hyperosmotic stress and stirring stress  
429 experiments were done between 14:30-15:30. 6 biological duplicates—each containing a  
430 pool of 30 animals—were collected for each genotype (*dscaml1*<sup>-/-</sup> and control) and stress  
431 condition (morning baseline, afternoon baseline, stirring stress, osmotic stress). Mutants  
432 and control animals are tested side by side for each experiment.

433 Stirring stress was induced by creating a vortex water flow with a spinning magnetic stir  
434 bar (Castillo-Ramirez et al., 2019). A small magnetic stir bar was placed into a 100 mm petri  
435 dish containing 35 animals and 20 ml of E3 media. The stir bar was rotated at 300 rpm with  
436 a stirring microplate for 5 minutes. Hyperosmotic stress was induced by increasing salt  
437 concentration in the media (Yeh et al., 2013). 30 animals were placed in 8 ml of E3 media.  
438 Then, 2 ml of prewarmed 1.25M NaCl was added to the media for a final concentration of 250  
439 mM for 20 minutes.

440 Sample homogenization and cortisol extraction were performed as described by Yeh et  
441 al. (Yeh et al., 2013). Briefly, 5 dpf larvae were rapidly immobilized with ice-cold E3 media  
442 and then flash-frozen at -80°C. Once all samples were collected, cortisol from the frozen  
443 samples was extracted with ethyl acetate (33211-1L-R; Sigma-Aldrich). Cortisol  
444 concentration was measured using a commercial ELISA kit, following the manufacturer's  
445 instructions (500360; Cayman Chemical). Sample plates were read with a microplate reader  
446 (FilterMax F3; MicroDevices) 90-120 minutes after initial development.

#### 447 **Live imaging of CRH neurons**

448 Cre-mediated recombination of the *crhb:LRLG* transgene was induced by injecting Cre  
449 mRNA into the embryo at the 1-cell stage. To achieve partial Cre-mediated recombination,  
450 ~30 pg of CreER mRNA was injected at the 1-cell stage and 4-Hydroxytamoxifen (4-OHT)  
451 was added to the embryo media at 6 hpf (10  $\mu$ M), followed by washout with E3 media at 24  
452 hpf. To achieve complete Cre-mediated recombination, ~50 pg of *in vitro* transcribed Cre.zf1  
453 mRNA (#61391, Addgene) was injected into the embryos (Horstick et al., 2015).

454 To perform confocal live imaging, 3 dpf animals were anesthetized with 0.01% tricaine  
455 methanesulfonate (MS-222, Sigma) and embedded in 1% low-melting point agarose, with  
456 the dorsal side resting on the glass surface inside the glass-bottomed petri dish (P50G-1.5-  
457 14-F; MatTek) (Beier et al., 2016). The petri dish was then filled with E3 media containing  
458 0.01% tricaine methanesulfonate (MS-222, Sigma). Confocal z-stacks were acquired every  
459 15 or 30 minutes for 12 hours on a Nikon A1 confocal microscope.

460 Two-photon live imaging was done on a custom Bruker two-channel two-photon  
461 microscope. A tuneable Ti:Sapphire laser (Chameleon Vision II; Coherent) was tuned to 980  
462 nm to excite RFP and GFP simultaneously. 78 hpf animals were anesthetized and embedded  
463 the same way as confocal live imaging, but with the dorsal side away from the cover glass.  
464 Each animal was imaged at 78, 84, 96, 108, and 120 hpf (Fig. 7A). After each time point,  
465 imaged larvae were gently removed from the agarose and recovered in E3 media at 28.5°C  
466 under normal day/night cycles. After the last time point, genomic DNA was prepared for all  
467 imaged animals and genotyped.

## 468 **Image Processing and Statistical Analyses**

469 Images were processed using Fiji—an open-source image processing software  
470 (Schindelin et al., 2012). For FISH images, images were convolved (kernel=12) to enhance

471 cell boundaries, and the center of each cell was manually tagged using the ROI manager tool.  
472 The cell number equals the number of ROIs in each animal. The signal intensity per cell was  
473 defined as the median signal intensity of all ROIs in a given animal. The number of RFP+ cells  
474 in *crhb:LRLG* animals were counted using the ROI manager tool without convolution. For  
475 confocal live imaging, images were pre-processed using the Denoise.AI function in the Nikon  
476 Elements software. For two-photon imaging, z-stacks from different time points were  
477 aligned using the “Correct 3D drift” function. Spectral overlap between the RFP and GFP  
478 channels was linearly unmixed. Individual cells were tracked with the MTrackJ plugin in Fiji  
479 (Meijering et al., 2012).

480 All statistical analyses were performed in GraphPad Prism (Version 9). For normally-  
481 distributed data, parametric tests (*t*-test or ANOVA) were used. For non-normally  
482 distributed data, non-parametric tests (Mann-Whitney) were used. The Holm-Sidak post-  
483 test was used to correct for multiple comparisons, and the adjusted *p* values are shown. All  
484 values are expressed as mean ± standard error, unless otherwise noted. Statistical tests were  
485 considered significant when *p*<0.05.

## 486 **AUTHOR CONTRIBUTIONS**

487 M.M and Y.A.P conceived and designed the experiments. M.M and A.A.B prepared samples  
488 for RNA sequencing. Y.A.P analyzed the RNA sequencing data. M.M performed ELISA and  
489 histochemistry experiments and analyzed the data. M.M and K.C.C performed *in situ*  
490 hybridization experiments and analyzed the data with contributions from C.S, and K.S. S.H  
491 generated the *crhbl:LRLG* transgenic line. M.M and Y.A.P wrote the manuscript. Y.A.P  
492 provided project administration and acquired funding.

## 493 **ACKNOWLEDGEMENTS**

494 We thank the animal care staff and veterinarians for animal husbandry; members of the  
495 Pan laboratory for helpful discussions; R. Settlege for computational analysis of RNA-seq  
496 data; S. Ryu and C. Yeh for sharing unpublished data; S. Imani for help with the quantification  
497 of IHC data; M. Wagle and S. Guo for advice on cortisol extraction procedures; M. Fox and A.  
498 Morozov for constructive feedback on the manuscript.

## 499 **FUNDING**

500 This work was supported by the Commonwealth Research Commercialization Fund  
501 (ER14S-001LS to Y.A.P), the Virginia-Maryland College of Veterinary Medicine Intramural  
502 Research Fund, the Commonwealth Health Research Board Grant (#208-06-21 to Y.A.P), and  
503 funding from Virginia Tech.

## 504 **DATA AVAILABILITY**

505 Next-generation sequencing data utilized in this publication are available from the Gene  
506 Expression Omnibus (accession code GSE213858).

## 507 **FIGURE LEGENDS**

508 **Fig. 1. Differential gene expression analysis of *dscaml1* deficient zebrafish.** (A) Volcano  
509 plot of relative gene expression in *dscaml1*<sup>-/-</sup> versus control animals. Each dot represents an  
510 individual gene, with colored dots representing gene groups as indicated on the graph. The  
511 dotted lines show the significance level (adjusted  $p < 0.01$ ) and fold change (increase or  
512 decrease by two-fold or more) thresholds. (B, C) Protein class categorization analysis for  
513 upregulated (B) and downregulated (C) genes. (D) Table of significantly enriched ( $p < 0.05$ )  
514 GO terms for molecular function.

515 **Fig 2. *dscaml1* deficiency alters the development of CRH<sup>NPO</sup> neurons.** (A) Illustration of  
516 CRH neurons (gray circles) in the NPO (boxed area) in the larval zebrafish. (B-D')  
517 Developmental trajectory of CRH<sup>NPO</sup> neurons, labeled by *crhb* FISH. At each developmental  
518 stage, a representative confocal z-stack projection of the whole brain is shown in the left  
519 panel, and the substack containing the NPO is enlarged and shown in the right panel. The  
520 white boxes indicate the locations of the NPO, and the yellow ovals mark the eyes. Wild-type  
521 (WT) animals are shown in panels B, C, and D. *dscaml1*<sup>-/-</sup> animals are shown in panels  
522 B', C', and D'. (E-F) Quantification of the signal intensity per cell (E) and cell number (F).  
523 Multiple-comparison corrected *p* values are as shown. WT: n=9 (2 dpf), 13 (3 dpf), 15 (5 dpf).  
524 *dscaml1*<sup>-/-</sup>: n=9 (2 dpf), 13 (3 dpf), 18 (5 dpf). Scale bars are 20  $\mu$ m. Mean, standard error,  
525 and corrected *p* values are shown.

526 **Fig. 3. Fluorescent labeling and live imaging of CRH<sup>NPO</sup> neurons.** (A) Schematic of CRISPR  
527 -mediated knock-in of the *hsp-Lox-RFP-Lox-GFP* cassette at the sgRNA target site, located 35  
528 bp upstream of exon 1 of *crhb*. The orientation and junctional structure of insertion have not  
529 been determined. (B) Schematic of *crhb:LRLG* expression. Each circle represents a  
530 fluorescent cell. Without Cre (default), RFP is expressed in all cells. With full recombination,  
531 all cells express GFP. Partial recombination results in mosaic RFP and GFP labeling. (C)  
532 Dorsal view of a fixed 5 dpf *crhb:LRLG* larvae with partial recombination stained with anti-  
533 RFP (magenta) and anti-GFP (green). The boxed area marks the NPO. (D) Higher  
534 magnification image of the NPO. Both RFP and GFP-positive neurons can be seen. (E-F')  
535 Images of anti-RFP stained *crh:LRLG* animals without recombination. Representative wild-  
536 type (WT, E-E') and *dscaml1*<sup>-/-</sup> (F-F') NPO neurons are shown. (G) Quantification of RFP-  
537 positive cells at 3 and 5 dpf. WT: n=5 (3 dpf), 16 (5 dpf). *dscaml1*<sup>-/-</sup>: n=11 (3 dpf), 17 (5 dpf).



538 Mean, standard error, and corrected  $p$  values are shown. (H-H'') Live *crhb:LRLG* larvae with  
539 partial recombination were imaged from 72 to 84 hpf. Three time points are shown here.  
540 Two cells (arrowheads, one green and one magenta) move away over time. (I-I'') Live  
541 *crhb:LRLG;mpeg1:Gal4;UAS:NTR-mCherry* larvae with CRH neurons labeled with GFP (green)  
542 and microglia labeled with mCherry (magenta). In this image series, one CRH neuron  
543 (arrowhead) is engulfed (I') and then removed (I'') by a microglial cell. Images are confocal  
544 optical sections. (J-J') Panels showing enlarged views of the boxed area in I'', with (J) or  
545 without (J') the mCherry channel. The remnant of the CRH neuron can still be seen inside the  
546 microglia (arrowheads). Scale bars are 100  $\mu\text{m}$  (panel C) or 20  $\mu\text{m}$  (all other images).

547 **Fig. 4. Live tracking of CRH<sup>NPO</sup> neuron cell fate.** (A) Timeline of time-lapse two-photon (2P)  
548 imaging experiment. Partial recombination of *crhb:LRLG* was induced by 4-OHT at 6-24 hpf,  
549 and imaging was performed at 78, 84, 96, 108, and 120 hpf. Animals were briefly  
550 anesthetized during imaging and allowed to recover in between imaging sessions. (B-B'')  
551 Tracking of individual CRH<sup>NPO</sup> neurons. Three example time frames are shown. Individual  
552 fluorescent cells can be tracked over time and are divided into two categories: persisting  
553 (white arrows) or lost (pink arrow). (C) Quantification of the percentage of persisting versus  
554 lost CRH<sup>NPO</sup> neurons. Sample size (cell number) as indicated for each genotype. (D) Survival  
555 curve of individual CRH<sup>NPO</sup> neurons in each genotypic group.

556 **Fig. 5. Cortisol levels and response to exogenous glucocorticoids.** (A-B) Cortisol profile  
557 for 5 dpf larvae. For each sample (dot), cortisol was extracted from a pool of 30 animals.  $n=6$   
558 for all groups. Median, interquartile range, and corrected  $p$  values are shown. (A) Baseline  
559 cortisol in control (black) and *dscaml1*<sup>-/-</sup> (red) animals. (B) Baseline normalized cortisol fold  
560 change in control (black) and *dscaml1*<sup>-/-</sup> (red) animals. (C) Quantification of *crhb* signal

561 intensity per cell in CRH<sup>NPO</sup> neurons. Vehicle: n=10 (WT), 11 (*dscaml1*<sup>-/-</sup>). Dex: n=7 (WT), 11  
562 (*dscaml1*<sup>-/-</sup>). Mean, standard error, and corrected *p* values are shown.

563 **Fig. 6. Summary of findings.** Schematic summary of findings. CRH<sup>NPO</sup> neurons are formed  
564 normally early on (2 dpf) but begin to exhibit developmental abnormalities in *dscaml1*  
565 deficient animals. The developmental deficits of CRH<sup>NPO</sup> neurons and other systemic  
566 developmental deficits likely contribute collectively to cause the hyperactive stress axis and  
567 attenuated acute stress response in *dscaml1* mutants.

568 **Supplementary Fig. 1. CRH<sup>NPO</sup> neuron development is impaired in the absence of**  
569 **ambient light (dark reared).** Quantification of CRH<sup>NPO</sup> neurons, labeled by *crhb* FISH.  
570 Graphs show the signal intensity per cell (A) and cell number (B). Multiple-comparison  
571 corrected *p* values are as shown. WT: n=10 (3 dpf), 15 (5 dpf). *dscaml1*<sup>-/-</sup>: n=17 (3 dpf), 15  
572 (5 dpf)

573 **Supplementary Fig. 2. The *crhb:LRLG* transgenic line labels CRH-expressing neurons.**  
574 (A-A'') Most RFP+ neurons (magenta, anti-RFP) express the CRH protein (green, anti-CRH).  
575 (B) Percentage of RFP+ neurons that express CRH. Mean, standard error, and sample size are  
576 shown. The scale bar is 20  $\mu$ m.

577 **Supplementary Fig. 3. *dscaml1* is expressed in CRH<sup>NPO</sup> neurons during larval**  
578 **development.** Double FISH with *crhb* (green, A) and *dscaml1* (magenta, A'') RNA probes at  
579 5 dpf. Merged image is shown in A''. Dotted circles mark the outline of *crhb*+ cells that express  
580 *dscaml1* (white) or do not express *dscaml1* (yellow). The scale bar is 20  $\mu$ m.

581 **Supplementary Video 1.** Time-lapse movie of *crhb:LRLG* larvae. CRH neurons were labeled  
582 with RFP (magenta) and GFP (green). Two cells (arrowheads, one green and one magenta),  
583 the same ones as shown in Fig. 5H-H'', move away over time.

584 **Supplementary Video 2.** Time-lapse movie of larvae with CRH neurons labeled with GFP  
585 (green) and microglia labeled with mCherry (magenta). The red “X” marks the cell indicated  
586 in Fig. 3I-J’. Maximum projection of z-stack for each time point is shown.

## 587 REFERENCES

- 588 Alderman SL, Bernier NJ (2009) Ontogeny of the corticotropin-releasing factor system in zebrafish.  
589 *Gen Comp Endocrinol* 164:61-69.
- 590 Alsop D, Vijayan MM (2008) Development of the corticosteroid stress axis and receptor expression  
591 in zebrafish. *Am J Physiol Regul Integr Comp Physiol* 294:R711-719.
- 592 Alsop D, Vijayan M (2009) The zebrafish stress axis: molecular fallout from the teleost-specific  
593 genome duplication event. *Gen Comp Endocrinol* 161:62-66.
- 594 Alvarez-Bolado G (2019) Development of neuroendocrine neurons in the mammalian hypothalamus.  
595 *Cell Tissue Res* 375:23-39.
- 596 Arnett MG, Muglia LM, Laryea G, Muglia LJ (2016) Genetic Approaches to Hypothalamic-Pituitary-  
597 Adrenal Axis Regulation. *Neuropsychopharmacology* 41:245-260.
- 598 Ates KM, Wang T, Moreland T, Veeranan-Karmegam R, Ma M, Jeter C, Anand P, Wenzel W, Kim HG,  
599 Wolfe LA, Stephen J, Adams DR, Markello T, Tiff CJ, Settlage R, Gahl WA, Gonsalvez GB,  
600 Malicdan MC, Flanagan-Steet H, Pan YA (2020) Deficiency in the endocytic adaptor proteins  
601 PHETA1/2 impairs renal and craniofacial development. *Disease models & mechanisms* 13.
- 602 Bai Y, Liu H, Huang B, Wagle M, Guo S (2016) Identification of environmental stressors and validation  
603 of light preference as a measure of anxiety in larval zebrafish. *BMC neuroscience* 17:63.
- 604 Barton BA, Schreck CB, Barton LD (1987) Effects of chronic cortisol administration and daily acute  
605 stress on growth, physiological conditions, and stress responses in juvenile rainbow trout.  
606 *Diseases of aquatic organisms* 2:173-185.
- 607 Beier KT, Mundell NA, Pan YA, Cepko CL (2016) Anterograde or Retrograde Transsynaptic Circuit  
608 Tracing in Vertebrates with Vesicular Stomatitis Virus Vectors. *Curr Protoc Neurosci* 74:1 26  
609 21-21 26 27.
- 610 Caramillo EM, Khan KM, Collier AD, Echevarria DJ (2015) Modeling PTSD in the zebrafish: are we  
611 there yet? *Behav Brain Res* 276:151-160.
- 612 Castillo-Ramirez LA, Ryu S, De Marco RJ (2019) Active behaviour during early development shapes  
613 glucocorticoid reactivity. *Sci Rep* 9:12796.
- 614 Chandrasekar G, Lauter G, Hauptmann G (2007) Distribution of corticotropin-releasing hormone in  
615 the developing zebrafish brain. *J Comp Neurol* 505:337-351.
- 616 Clark KJ, Boczek NJ, Ekker SC (2011) Stressing zebrafish for behavioral genetics. *Reviews in the*  
617 *neurosciences* 22:49-62.
- 618 Dallman MF, Akana SF, Scribner KA, Bradbury MJ, Walker CD, Strack AM, Cascio CS (1992) Stress,  
619 Feedback and Facilitation in the Hypothalamo-Pituitary-Adrenal Axis. *J Neuroendocrinol*  
620 4:517-526.
- 621 Denver RJ (2009) Structural and functional evolution of vertebrate neuroendocrine stress systems.  
622 *Ann N Y Acad Sci* 1163:1-16.
- 623 Espenschied S, T., Cronan Mark R, Matty Molly A, Mueller O, Redinbo Matthew R, Tobin David M,  
624 Rawls John F (2019) Epithelial delamination is protective during pharmaceutical-induced  
625 enteropathy. *Proceedings of the National Academy of Sciences* 116:16961-16970.
- 626 Forger NG (2009) Control of cell number in the sexually dimorphic brain and spinal cord. *J*  
627 *Neuroendocrinol* 21:393-399.

- 628 Fuerst PG, Bruce F, Tian M, Wei W, Elstrott J, Feller MB, Erskine L, Singer JH, Burgess RW (2009)  
629 DSCAM and DSCAML1 function in self-avoidance in multiple cell types in the developing  
630 mouse retina. *Neuron* 64:484-497.
- 631 Garrett AM, Tadenev AL, Burgess RW (2012) DSCAMs: restoring balance to developmental forces.  
632 *Frontiers in molecular neuroscience* 5:86.
- 633 Garrett AM, Tadenev AL, Hammond YT, Fuerst PG, Burgess RW (2016) Replacing the PDZ-interacting  
634 C-termini of DSCAM and DSCAML1 with epitope tags causes different phenotypic severity in  
635 different cell populations. *eLife* 5.
- 636 Griffiths BB, Schoonheim PJ, Ziv L, Voelker L, Baier H, Gahtan E (2012) A zebrafish model of  
637 glucocorticoid resistance shows serotonergic modulation of the stress response. *Front Behav*  
638 *Neurosci* 6:68.
- 639 Hayase Y et al. (2020) Down syndrome cell adhesion molecule like-1 (DSCAML1) links the GABA  
640 system and seizure susceptibility. *Acta Neuropathologica Communications* 8:206.
- 641 Herget U, Ryu S (2015) Coexpression analysis of nine neuropeptides in the neurosecretory preoptic  
642 area of larval zebrafish. *Front Neuroanat* 9:2.
- 643 Herget U, Wolf A, Wullmann MF, Ryu S (2014) Molecular neuroanatomy and chemoarchitecture of  
644 the neurosecretory preoptic-hypothalamic area in zebrafish larvae. *J Comp Neurol* 522:1542-  
645 1564.
- 646 Hooper A, Paracha R, Maguire J (2018) Seizure-induced activation of the HPA axis increases seizure  
647 frequency and comorbid depression-like behaviors. *Epilepsy & behavior : E&B* 78:124-133.
- 648 Horstick EJ, Jordan DC, Bergeron SA, Tabor KM, Serpe M, Feldman B, Burgess HA (2015) Increased  
649 functional protein expression using nucleotide sequence features enriched in highly  
650 expressed genes in zebrafish. *Nucleic acids research* 43:e48.
- 651 Iossifov I et al. (2014) The contribution of de novo coding mutations to autism spectrum disorder.  
652 *Nature* 515:216-221.
- 653 Irls C, Nava-Kopp AT, Morán J, Zhang L (2014) Neonatal maternal separation up-regulates protein  
654 signalling for cell survival in rat hypothalamus. *Stress* 17:275-284.
- 655 Johnson SA, Fournier NM, Kalynchuk LE (2006) Effect of different doses of corticosterone on  
656 depression-like behavior and HPA axis responses to a novel stressor. *Behavioural Brain*  
657 *Research* 168:280-288.
- 658 Karaca E et al. (2015) Genes that Affect Brain Structure and Function Identified by Rare Variant  
659 Analyses of Mendelian Neurologic Disease. *Neuron* 88:499-513.
- 660 Keen-Rhinehart E, Michopoulos V, Toufexis DJ, Martin EI, Nair H, Ressler KJ, Davis M, Owens MJ,  
661 Nemeroff CB, Wilson ME (2009) Continuous expression of corticotropin-releasing factor in  
662 the central nucleus of the amygdala emulates the dysregulation of the stress and reproductive  
663 axes. *Molecular psychiatry* 14:37-50.
- 664 Kimura Y, Hisano Y, Kawahara A, Higashijima S (2014) Efficient generation of knock-in transgenic  
665 zebrafish carrying reporter/driver genes by CRISPR/Cas9-mediated genome engineering. *Sci*  
666 *Rep* 4:6545.
- 667 Kolber BJ, Boyle MP, Wiczorek L, Kelley CL, Onwuzurike CC, Nettles SA, Vogt SK, Muglia LJ (2010)  
668 Transient early-life forebrain corticotropin-releasing hormone elevation causes long-lasting  
669 anxiogenic and despair-like changes in mice. *J Neurosci* 30:2571-2581.
- 670 Lister JA, Robertson CP, Lepage T, Johnson SL, Raible DW (1999) nacre encodes a zebrafish  
671 microphthalmia-related protein that regulates neural-crest-derived pigment cell fate.  
672 *Development* 126:3757-3767.
- 673 Lohr H, Hammerschmidt M (2011) Zebrafish in endocrine systems: recent advances and implications  
674 for human disease. *Annu Rev Physiol* 73:183-211.
- 675 Lohr H, Ryu S, Driever W (2009) Zebrafish diencephalic A11-related dopaminergic neurons share a  
676 conserved transcriptional network with neuroendocrine cell lineages. *Development*  
677 136:1007-1017.

- 678 Love MI, Huber W, Anders S (2014) Moderated estimation of fold change and dispersion for RNA-seq  
679 data with DESeq2. *Genome Biology* 15:550.
- 680 Ma M, Kler S, Pan YA (2020a) Structural Neural Connectivity Analysis in Zebrafish With Restricted  
681 Anterograde Transneuronal Viral Labeling and Quantitative Brain Mapping. *Frontiers in*  
682 *neural circuits* 13:85.
- 683 Ma M, Ramirez AD, Wang T, Roberts RL, Harmon KE, Schoppik D, Sharma A, Kuang C, Goei SL, Gagnon  
684 JA, Zimmerman S, Tsai SQ, Reyon D, Joung JK, Aksay ERF, Schier AF, Pan YA (2020b) Zebrafish  
685 *dscaml1* Deficiency Impairs Retinal Patterning and Oculomotor Function. *J Neurosci* 40:143-  
686 158.
- 687 Maack G, Segner H (2003) Morphological development of the gonads in zebrafish. *Journal of Fish*  
688 *Biology* 62:895-906.
- 689 Mazaheri F, Breus O, Durdu S, Haas P, Wittbrodt J, Gilmour D, Peri F (2014) Distinct roles for BAI1  
690 and TIM-4 in the engulfment of dying neurons by microglia. *Nature communications* 5:4046.
- 691 McEwen BS, Akil H (2020) Revisiting the Stress Concept: Implications for Affective Disorders. *J*  
692 *Neurosci* 40:12-21.
- 693 Meijering E, Dzyubachyk O, Smal I (2012) Methods for cell and particle tracking. *Methods Enzymol*  
694 504:183-200.
- 695 Mi H, Ebert D, Muruganujan A, Mills C, Albu L-P, Mushayamaha T, Thomas PD (2021) PANTHER  
696 version 16: a revised family classification, tree-based classification tool, enhancer regions and  
697 extensive API. *Nucleic acids research* 49:D394-D403.
- 698 Moreland T, Poulain FE (2022) To Stick or Not to Stick: The Multiple Roles of Cell Adhesion Molecules  
699 in Neural Circuit Assembly. *Frontiers in Neuroscience* 16.
- 700 Muto A, Taylor MR, Suzawa M, Korenbrot JI, Baier H (2013) Glucocorticoid receptor activity regulates  
701 light adaptation in the zebrafish retina. *Frontiers in neural circuits* 7:145.
- 702 Nagpal J, Herget U, Choi MK, Ryu S (2019) Anatomy, development, and plasticity of the  
703 neurosecretory hypothalamus in zebrafish. *Cell Tissue Res* 375:5-22.
- 704 Nüsslein-Volhard C, Gilmour D, Dahm R (2002) Introduction: zebrafish as a system to study  
705 development and organogenesis. *Zebrafish: a practical approach*:1-5.
- 706 O'Toole KK, Hooper A, Wakefield S, Maguire J (2014) Seizure-induced disinhibition of the HPA axis  
707 increases seizure susceptibility. *Epilepsy research* 108:29-43.
- 708 Ogata S, Hashizume K, Hayase Y, Kanno Y, Hori K, Balan S, Yoshikawa T, Takahashi H, Taya S, Hoshino  
709 M (2021) Potential involvement of DSCAML1 mutations in neurodevelopmental disorders.  
710 *Genes to Cells* 26:136-151.
- 711 Pan YA, Choy M, Prober DA, Schier AF (2012) Robo2 determines subtype-specific axonal projections  
712 of trigeminal sensory neurons. *Development* 139:591-600.
- 713 Placzek M, Fu T, Towers M (2020) Development of the Neuroendocrine Hypothalamus. In:  
714 *Developmental Neuroendocrinology* (Wray S, Blackshaw S, eds), pp 3-30. Cham: Springer  
715 International Publishing.
- 716 Regev L, Baram TZ (2014) Corticotropin releasing factor in neuroplasticity. *Front Neuroendocrinol*  
717 35:171-179.
- 718 Saadatmand F, Gurdziel K, Jackson L, Kwabi-Addo B, Ruden DM (2021) DNA methylation and  
719 exposure to violence among African American young adult males. *Brain, Behavior, &*  
720 *Immunity - Health* 14:100247.
- 721 Sachse SM, Lievens S, Ribeiro LF, Dascenco D, Masschaele D, Horre K, Misbaer A, Vanderroost N, De  
722 Smet AS, Salta E, Erfurth ML, Kise Y, Nebel S, Van Delm W, Plaisance S, Tavernier J, De Strooper  
723 B, De Wit J, Schmucker D (2019) Nuclear import of the DSCAM-cytoplasmic domain drives  
724 signaling capable of inhibiting synapse formation. *EMBO J* 38.
- 725 Sanes JR, Zipursky SL (2020) Synaptic Specificity, Recognition Molecules, and Assembly of Neural  
726 Circuits. *Cell* 181:536-556.

- 727 Schindelin J, Arganda-Carreras I, Frise E, Kaynig V, Longair M, Pietzsch T, Preibisch S, Rueden C,  
728 Saalfeld S, Schmid B, Tinevez JY, White DJ, Hartenstein V, Eliceiri K, Tomancak P, Cardona A  
729 (2012) Fiji: an open-source platform for biological-image analysis. *Nat Methods* 9:676-682.
- 730 Simerly RB (2002) Wired for reproduction: organization and development of sexually dimorphic  
731 circuits in the mammalian forebrain. *Annu Rev Neurosci* 25:507-536.
- 732 Spencer RL, Deak T (2017) A users guide to HPA axis research. *Physiol Behav* 178:43-65.
- 733 Stenzel-Poore MP, Cameron VA, Vaughan J, Sawchenko PE, Vale W (1992) Development of Cushing's  
734 syndrome in corticotropin-releasing factor transgenic mice. *Endocrinology* 130:3378-3386.
- 735 Stroth N, Holighaus Y, Ait-Ali D, Eiden LE (2011) PACAP: a master regulator of neuroendocrine stress  
736 circuits and the cellular stress response. *Annals of the New York Academy of Sciences*  
737 1220:49-59.
- 738 Vom Berg-Maurer CM, Trivedi CA, Bollmann JH, De Marco RJ, Ryu S (2016) The Severity of Acute  
739 Stress Is Represented by Increased Synchronous Activity and Recruitment of Hypothalamic  
740 CRH Neurons. *J Neurosci* 36:3350-3362.
- 741 Watts AG (2005) Glucocorticoid regulation of peptide genes in neuroendocrine CRH neurons: A  
742 complexity beyond negative feedback. *Frontiers in Neuroendocrinology* 26:109-130.
- 743 Wendelaar Bonga SE (1997) The stress response in fish. *Physiol Rev* 77:591-625.
- 744 Wilson CA, High SK, McCluskey BM, Amores A, Yan YL, Titus TA, Anderson JL, Batzel P, Carvan MJ, 3rd,  
745 Schartl M, Postlethwait JH (2014) Wild sex in zebrafish: loss of the natural sex determinant  
746 in domesticated strains. *Genetics* 198:1291-1308.
- 747 Wong FK, Marin O (2019) Developmental Cell Death in the Cerebral Cortex. *Annu Rev Cell Dev Biol*  
748 35:523-542.
- 749 Yamagata M, Sanes JR (2008) Dscam and Sidekick proteins direct lamina-specific synaptic  
750 connections in vertebrate retina. *Nature* 451:465-469.
- 751 Yamagata M, Sanes JR (2010) Synaptic localization and function of Sidekick recognition molecules  
752 require MAGI scaffolding proteins. *J Neurosci* 30:3579-3588.
- 753 Yamaguchi Y, Miura M (2015) Programmed cell death in neurodevelopment. *Dev Cell* 32:478-490.
- 754 Yeh CM, Glock M, Ryu S (2013) An optimized whole-body cortisol quantification method for assessing  
755 stress levels in larval zebrafish. *PLoS One* 8:e79406.
- 756 Zhang L, Hernández VS, Liu B, Medina MP, Nava-Kopp AT, Irlles C, Morales M (2012) Hypothalamic  
757 vasopressin system regulation by maternal separation: its impact on anxiety in rats.  
758 *Neuroscience* 215:135-148.
- 759 Ziv L, Muto A, Schoonheim PJ, Meijsing SH, Strasser D, Ingraham HA, Schaaf MJ, Yamamoto KR, Baier  
760 H (2013) An affective disorder in zebrafish with mutation of the glucocorticoid receptor.  
761 *Molecular psychiatry* 18:681-691.
- 762

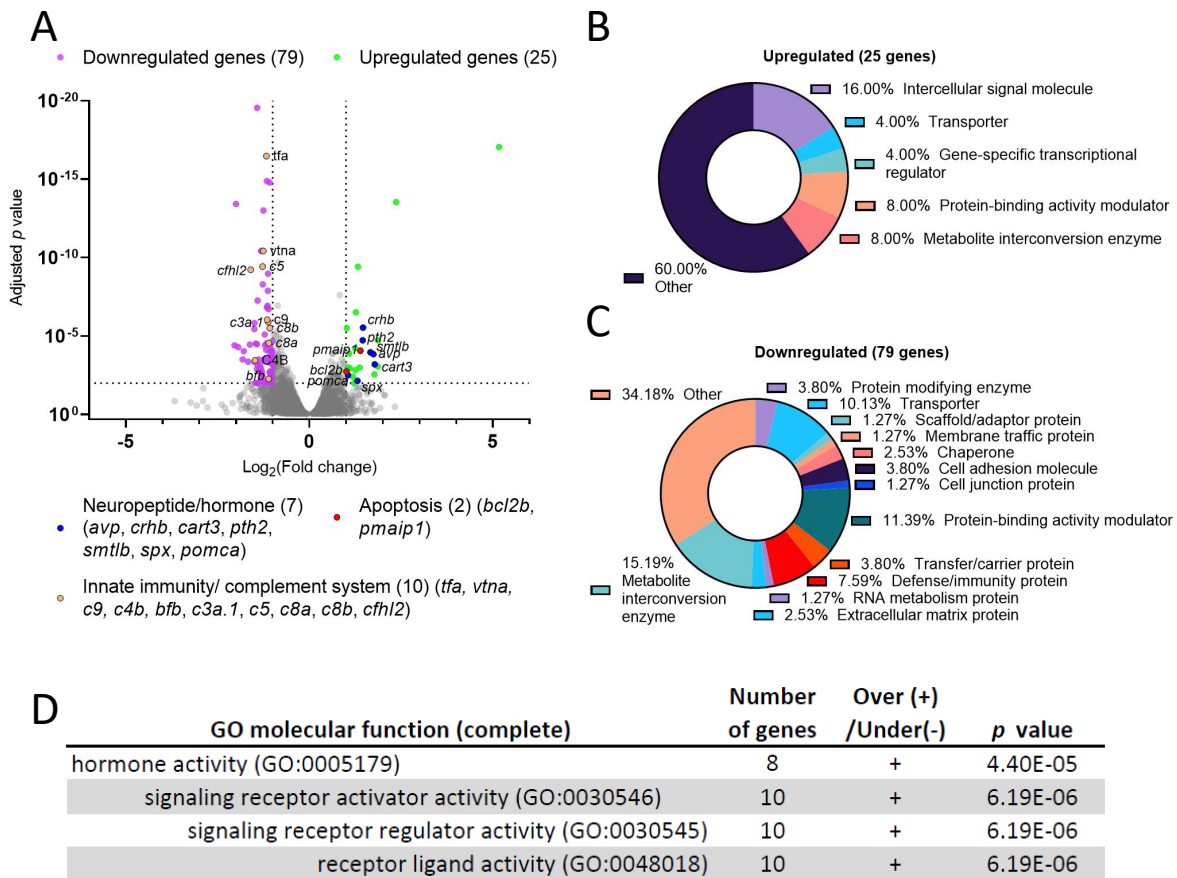

Figure 1

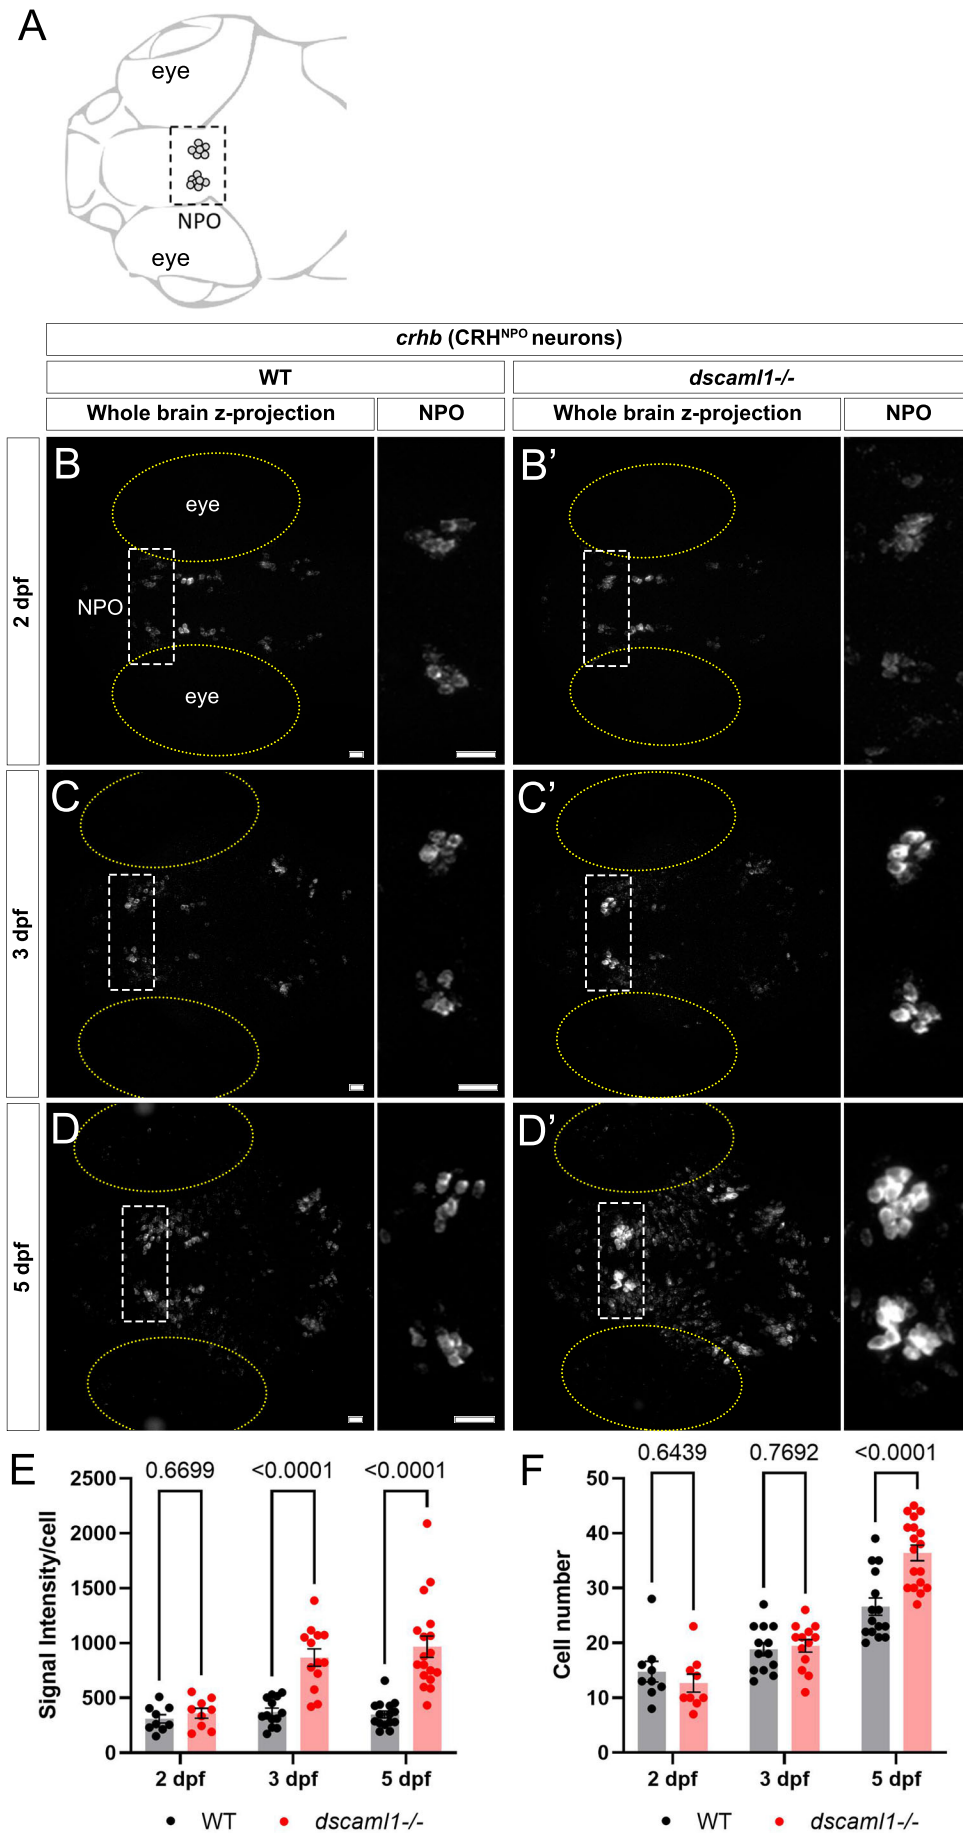

Figure 2



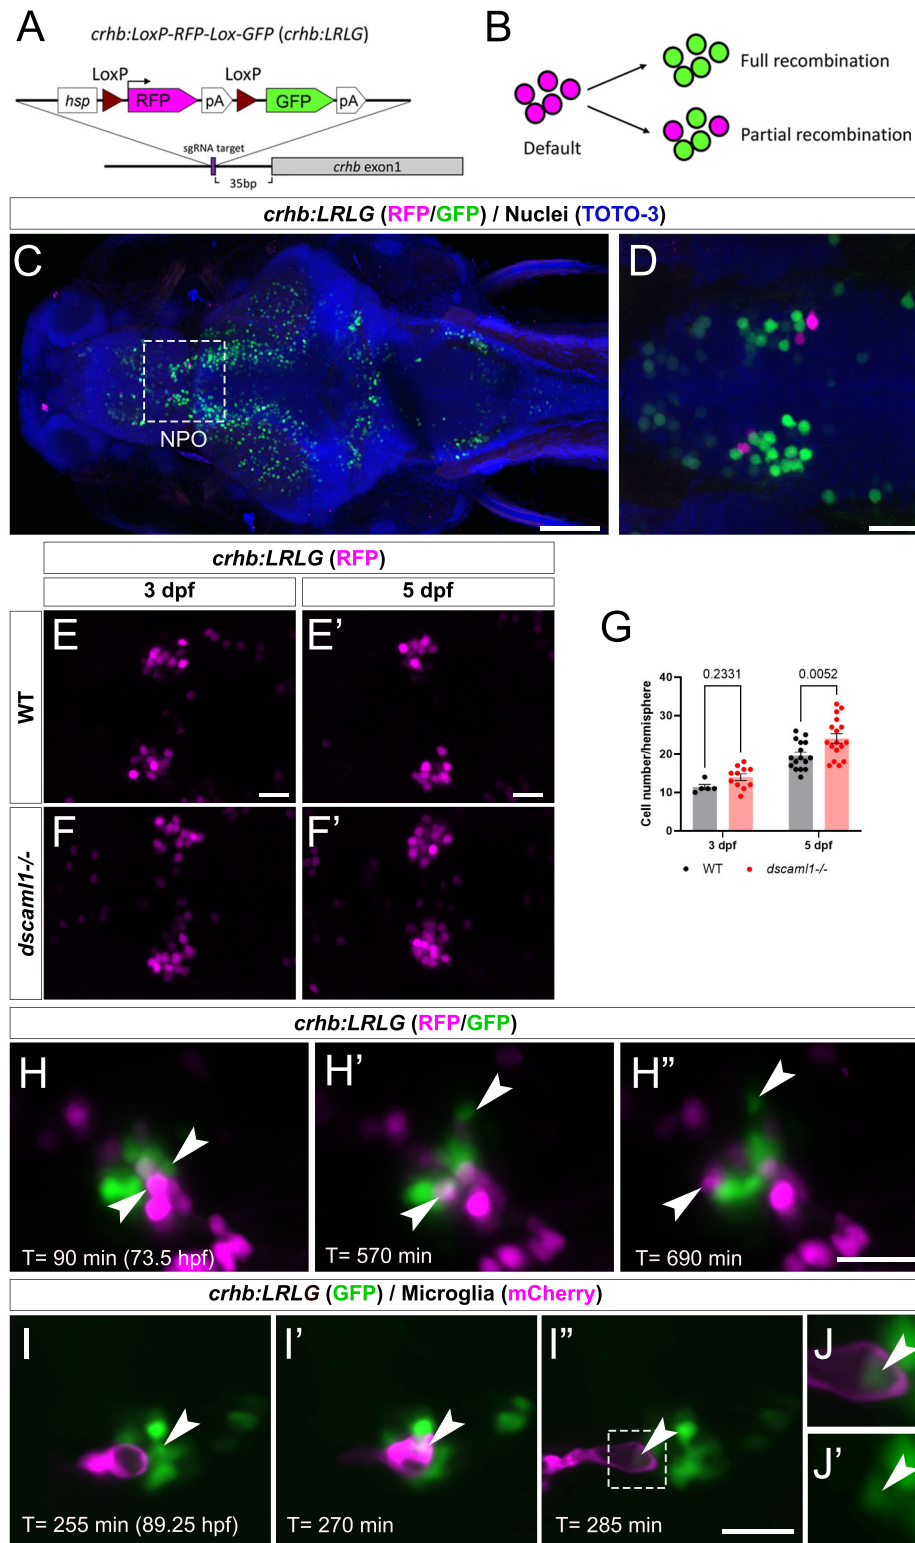

Figure 3

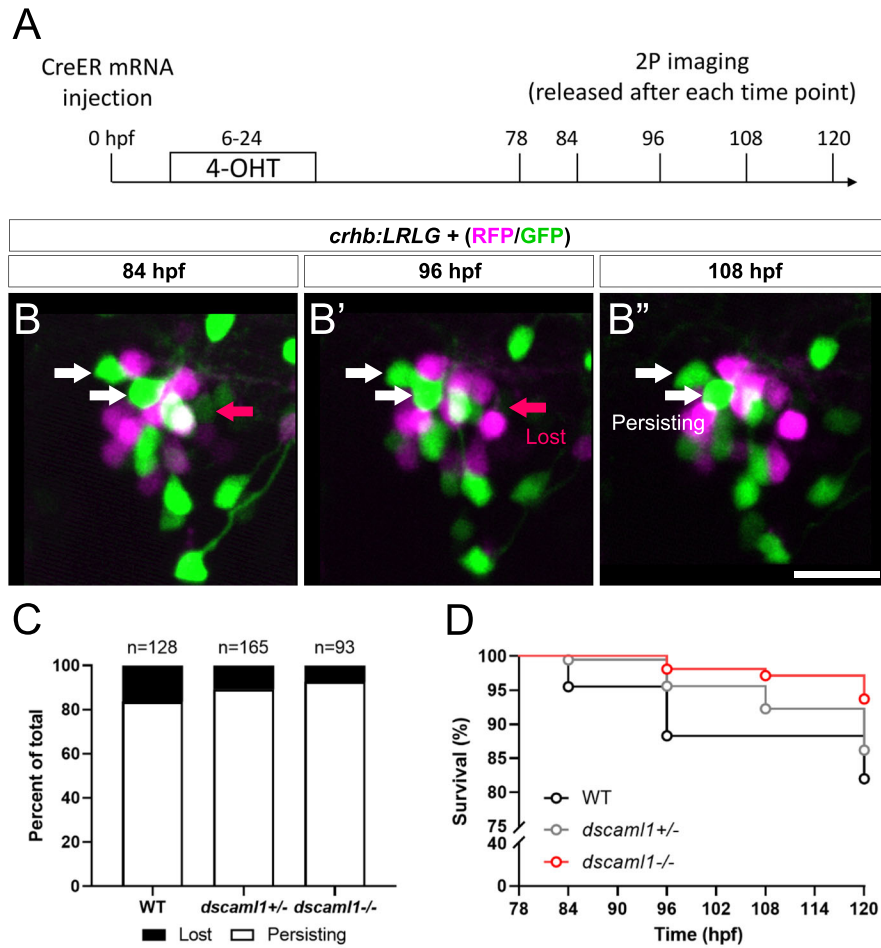

Figure 4

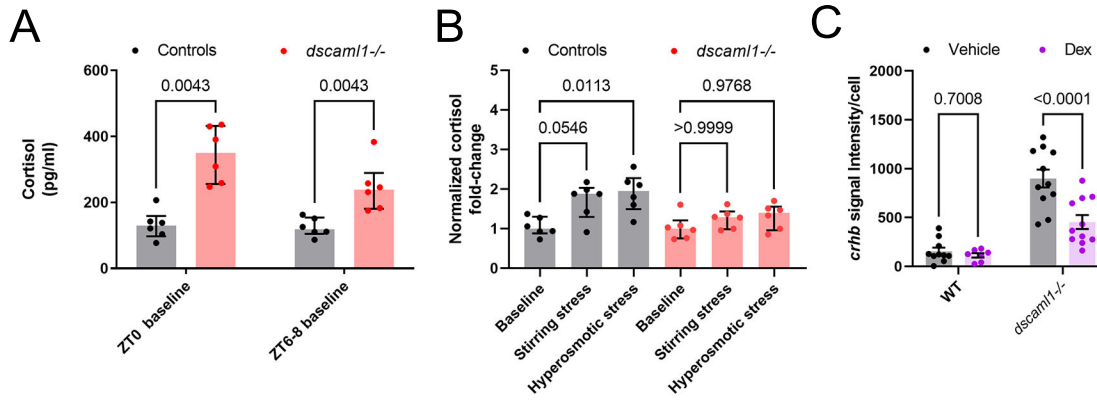

Figure 5

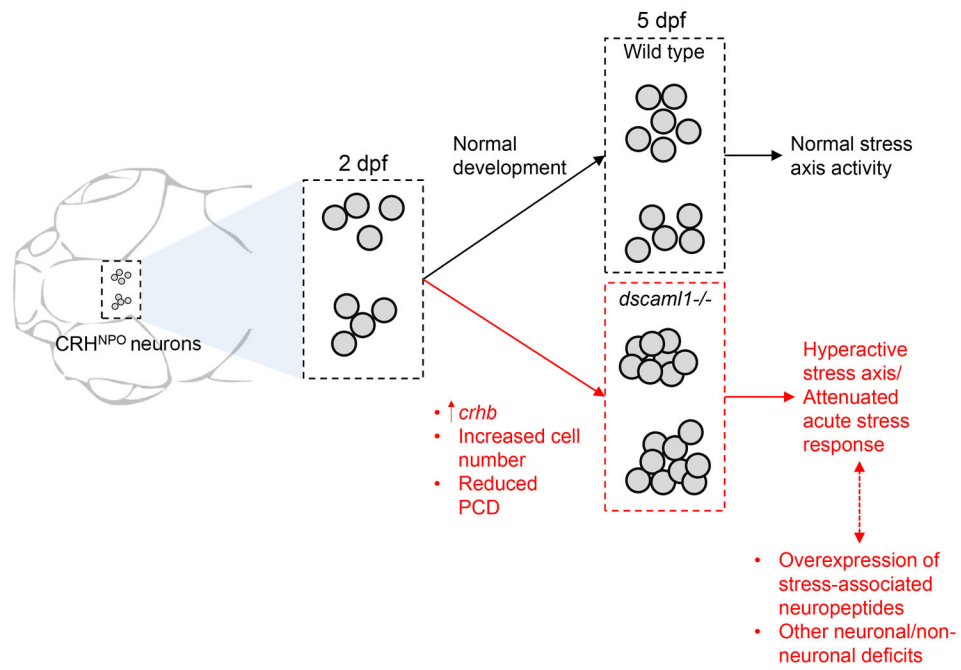

Figure 6

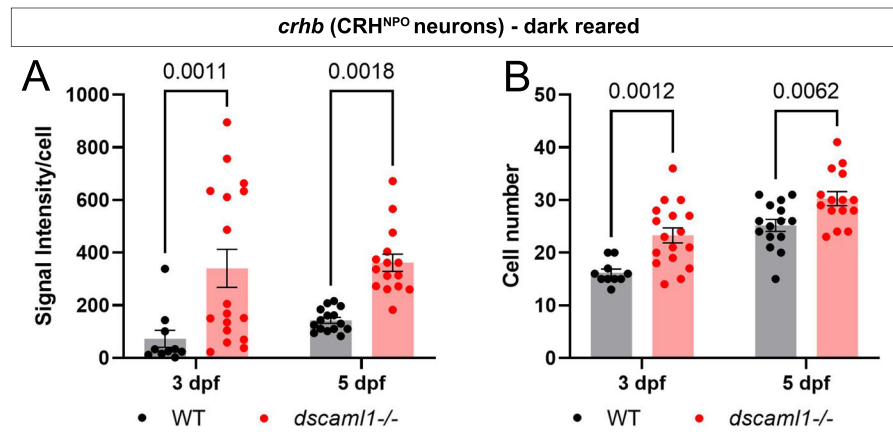

Supp. Fig. 1

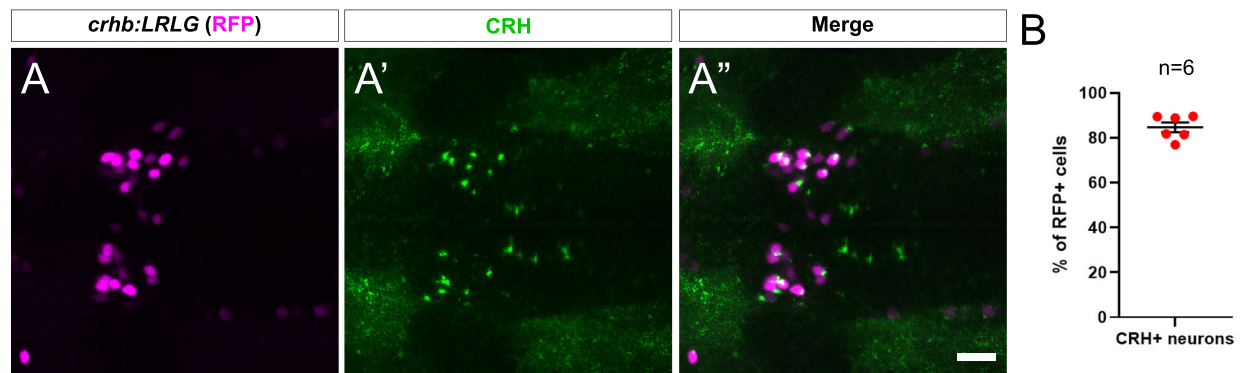

Supp. Fig. 2

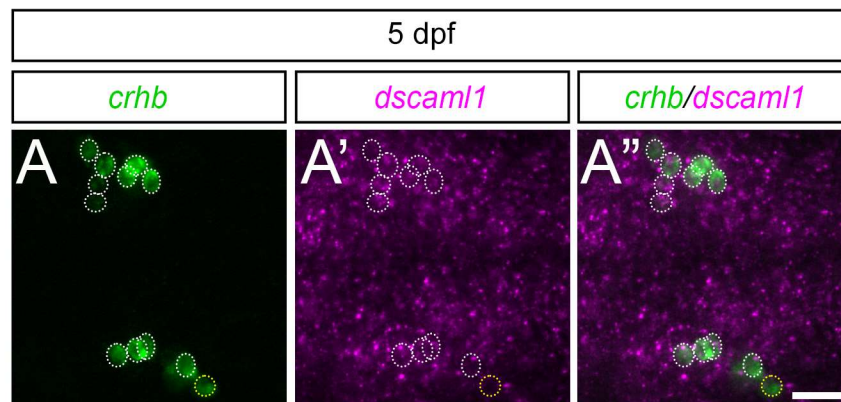

Supp. Fig. 3
